# Supplementary material
Source: publisher figshare collection journal article supplement (https://rs.figshare.com/ndownloader/files/35113052)
Supplement: Supplementary file 1 [file 35113052]

**Acclimation to low pH does not affect the thermal tolerance of *Arbacia lixula* progeny**

Shawna A. Foo1*, Marco Munari2, Maria Cristina Gambi3, Maria Byrne1

1 School of Life and Environmental Sciences, The University of Sydney, Sydney, New South Wales, Australia 2006

2 Stazione Zoologica Anton Dohrn, National Institute of Marine Biology, Ecology and Biotechnology, Dept. Integrative Marine Ecology, Ischia Marine Center, Punta San Pietro, Ischia, Naples, Italy 80077

3 National Institute of Oceanography and Applied Geophysics, OGS, Trieste (Italy)

*Corresponding author: [shawna.foo@sydney.edu.au](mailto:shawna.foo@sydney.edu.au)

**Supplementary Table 1. Temperature of the ten temperature baths used during the full experimental period (n = 13).**

| **Temp (°C)** | **16** | **18** | **20** | **22** | **24** | **26** | **28** | **30** | **32** | **34** |
| --- | --- | --- | --- | --- | --- | --- | --- | --- | --- | --- |
| **Avg ± SE (°C)** | 16.11 ± 0.16 | 18.36 ± 0.21 | 19.83 ± 0.12 | 22.03 ± 0.09 | 24.44  ± 0.05 | 25.79 ± 0.14 | 28.01 ± 0.11 | 29.81 ± 0.10 | 31.85 ± 0.05 | 33.75 ± 0.06 |

**Supplementary Table 2.** **The thermal optimum range (Topt) with survival ≥ 75%, lower and upper temperatures with >50% mortality (LT50) in *A. lixula* after 24 and 48 hours.** Temperatures for individual crosses and populations are displayed.

| Population | Cross | Topt (>75%) | Lower LT50 | Upper LT50 |
| --- | --- | --- | --- | --- |
| *24 hours* | | | | |
| Control | 1 | 20 - 26 | 16.5 | 30 |
| 2 | 21 - 26 | 17 | 29.5 |
| 3 | 21 - 25 | 17 | 29.5 |
| Vent | 1 | 16 – 29.5 | N/A | 31 |
| 2 | 16 – 29.5 | N/A | 31 |
| 3 | 16.5 – 26.5 | N/A | 29 |
| *48 hours* | | | | |
| Control | 1 | 16 – 29 | N/A | 31 |
| 2 | 16 - 29 | N/A | 31 |
| 3 | 16 – 29.5 | N/A | 30.5 |
| Vent | 1 | 16 – 28.5 | N/A | 30.5 |
| 2 | 16 – 29.5 | N/A | 31 |
| 3 | 17 – 26.5 | N/A | 29 |
